# Supplementary material
Source: HighWire-hosted journal article supplement (https://thorax.bmj.com/content/75/2/116)
Supplement: inline-supplementary-material-3 [file inline-supplementary-material-3.pdf]

## Online supplement

### **Percent low attenuation volume and fractal dimension of low attenuation clusters on computed tomography predict different long-term outcomes in COPD**

Kaoruko Shimizu<sup>1\*</sup>, Naoya Tanabe<sup>2\*</sup>, Nguyen Van Tho<sup>3</sup>, Masaru Suzuki<sup>1</sup>, Hironi Makita<sup>1,4</sup>, Susumu Sato<sup>2</sup>, Shigeo Muro<sup>2,5</sup>, Michiaki Mishima<sup>2,6</sup>, Toyohiro Hirai<sup>2</sup>, Emiko Ogawa<sup>3</sup>, Yasutaka Nakano<sup>3</sup>, Satoshi Konno<sup>1</sup>, Masaharu Nishimura<sup>1,4</sup> and the Hokkaido COPD Cohort Study investigators

\*These two authors contributed equally to the entire study and writing of the manuscript.

1. Department of Respiratory Medicine, Faculty of Medicine and Graduate School of Medicine, Hokkaido University, Sapporo, Japan.
2. Department of Respiratory Medicine, Graduate School of Medicine, Kyoto University, Kyoto, Japan
3. Division of Respiratory Medicine, Department of Internal Medicine, Shiga University of Medical Science, Shiga, Japan.
4. Hokkaido Institute of Respiratory Diseases, Sapporo, Japan
5. Department of Respiratory Medicine, Nara Medical University, Nara, Japan
6. Noe Hospital, Osaka, Japan

## 23    **Supplementary Results**

### 24    **Detail of study population in the the Hokkaido COPD and the Kyoto University** 25    **cohorts**

26    CONSORT-style diagrams for the Hokkaido COPD and the Kyoto University cohorts  
27    are shown in Supplementary Figure E1 and E2, respectively.

28    As shown in [Supplementary](#) Figure E1, 121 of the 279 patients in the original Hokkaido  
29    COPD Cohort study were recruited at Hokkaido University Hospital and underwent CT  
30    scans at the baseline evaluation (visit 1). However, CT data of 30 patients at visit 1 had  
31    not been preserved as DICOM files, and we could not perform the fractal analysis of  
32    emphysematous clusters for these patients in this study. In the initial evaluation of CT  
33    scans at visit 1 for the remaining 91 patients, 21 patients were excluded because their  
34    CT scans were not reconstructed with the standard reconstruction kernel (n=19) or  
35    abnormal chest shadows such as giant bullae or pleural thickening were found (n=2). In  
36    addition, further 26 patients who underwent CT scans at visit 3 were also included.  
37    Therefore, a total of 96 patients were included for the present analyses.

38    As shown in [Supplementary](#) Figure E2, 154 male patients with COPD were screened at  
39    Kyoto University Hospital. Among them, 24 patients were excluded because of  
40    interstitial pneumonia (n=4), bronchial asthma (n=2), bronchiectasis (n=11), abnormal  
41    shadows on chest CT scans (n=11), a history of malignancy within the past 5 years  
42    (n=5), and a history of lobectomy (n=1). Therefore, a total 130 male patients were  
43    included in the Kyoto University cohort study.

44

45    There were no significant differences in the anthropomorphic data and pulmonary  
46    function test results between the 96 patients included in the present study and the 279

patients considered eligible for the original cohort (Supplementary Table E1).

#### **Additional analysis regarding associations of baseline %LAV and fractal $D$ with FEV<sub>1</sub> decline, exacerbation, and survival in the Hokkaido COPD cohort**

~~Time to first e~~Exacerbations ~~wasere~~ ~~shorter~~~~more common~~ in the low  $D$  group than in the high  $D$  group ( $p < 0.01$  using the antibiotic definition,  $p = 0.01$  using the prescription definition) (Figure 2A and [Supplementary Figure E4](#)). There was no significant difference in the ~~frequency of~~time to first exacerbations between the high and low %LAV groups ( $p = 0.60$  using antibiotic definition,  $p = 0.75$  using the prescription definition; (Figure 2A and [Supplementary Figure E4](#)). The prognosis was poorer in the high %LAV group than in the low %LAV group ( $p < 0.01$ ) but did not differ between the low and high  $D$  groups ( $p = 0.30$ ; Figure 2B). The univariable Cox proportional hazards analyses showed that lower  $D$ , but not %LAV, was associated with shorter time to first exacerbation (hazard ratio [HR] 0.04 [95% CI 0.00–0.85],  $p = 0.04$ , and HR 1.03 [95% CI 0.99–1.06],  $p = 0.12$ ), whereas higher %LAV, but not  $D$ , is associated with mortality (HR 0.14 [95% CI 1.02–1.07],  $p < 0.01$ , and HR 0.11 [95% CI 0.01–1.35],  $p = 0.08$ , [Supplementary Table E2](#)). The results of the multivariable Cox proportional hazards analysis in the Hokkaido COPD cohort ([Supplementary Table E2](#)) did not show an association between lower  $D$  or high %LAV and time to first exacerbation or mortality.  
~~The results of multivariable Cox proportional hazards analysis in the Hokkaido COPD cohort (Table E2) did not show an association between lower  $D$  or high %LAV and exacerbation frequency or mortality.~~

#### **Supplementary Tables**

70

71 [Supplementary](#) Table E1. The characteristics in 96 patients included for the  
 72 present study and the whole participants of 279 patients in the Hokkaido COPD  
 73 cohort.

|                          | 96 patients in the<br>present study | 279 patients in the<br>original cohort | p    |
|--------------------------|-------------------------------------|----------------------------------------|------|
| Sex, male/female         | 89/7                                | 262/17                                 | 0.68 |
| Age, years               | 69.8 ± 8.0                          | 69.4 ± 7.9                             | 0.74 |
| Height, m                | 1.63±0.07                           | 1.63 ± 6.7                             | 0.82 |
| Weight, kg               | 60.0±10.5                           | 59.3±10.3                              | 0.54 |
| Body mass index          | 22.7 ± 3.1                          | 22.3±3.2                               | 0.33 |
| GOLD stage 1/2/3/4       | 29/45/19/3                          | 72/126/68/13                           | 0.65 |
| %FVC, %                  | 101.6± 14.6                         | 100.5 ± 18.9                           | 0.60 |
| %FEV <sub>1</sub> , %    | 66.2 ± 19.4                         | 64.5 ± 21.9                            | 0.51 |
| FEV <sub>1</sub> /FVC, % | 52.1 ± 12.6                         | 51.2 ± 12.7                            | 0.53 |

74 Data are shown as the means ± standard deviations. FEV<sub>1</sub>/FVC is an absolute % value.

75 Abbreviations: FVC, forced vital capacity, FEV<sub>1</sub>, forced expiratory volume in 1 s

76

77

78 [Supplementary](#) Table E2. Univariable and multivariable Cox proportional hazards  
 79 analysis of exacerbation and all-cause mortality in the Hokkaido COPD cohort  
 80 (n=96)

|                  | Exacerbation |           |         | Mortality |           |         |
|------------------|--------------|-----------|---------|-----------|-----------|---------|
|                  | HR           | 95% CI    | P value | HR        | 95% CI    | P value |
| <b>Model 1</b>   |              |           |         |           |           |         |
| %LAV             | 1.03         | 0.99-1.06 | 0.12    | 0.14      | 1.02-1.07 | <0.01   |
| <b>Model 2</b>   |              |           |         |           |           |         |
| D                | 0.04         | 0.00-0.85 | 0.04    | 0.11      | 0.01-1.35 | 0.08    |
| <b>Model 3</b>   |              |           |         |           |           |         |
| %LAV             | 1.01         | 0.96-1.05 | 0.76    | 1.03      | 1.00-1.07 | 0.08    |
| Age              | 0.98         | 0.93-1.04 | 0.50    | 1.15      | 1.07-1.23 | <0.01   |
| Height           | 1.01         | 0.91-1.11 | 0.47    | 1.04      | 0.94-1.14 | 0.46    |
| Weight           | 0.97         | 0.91-1.04 | 0.47    | 0.97      | 0.91-1.03 | 0.35    |
| FEV <sub>1</sub> | 0.48         | 0.16-1.36 | 0.17    | 1.56      | 0.65-3.71 | 0.32    |
| Smoking status   | 0.54         | 0.15-1.53 | 0.36    | 1.04      | 0.39-2.44 | 0.94    |
| <b>Model 4</b>   |              |           |         |           |           |         |
| D                | 0.51         | 0.00-4.60 | 0.25    | 0.29      | 0.02-5.18 | 0.40    |
| Age              | 0.98         | 0.92-1.04 | 0.07    | 1.15      | 1.08-1.23 | <0.01   |
| Height           | 1.00         | 0.92-1.09 | 0.66    | 1.08      | 1.00-1.17 | 0.06    |
| Weight           | 0.98         | 0.92-1.04 | 0.19    | 0.95      | 0.90-1.00 | 0.03    |
| FEV <sub>1</sub> | 0.52         | 0.19-1.43 | 0.93    | 1.27      | 0.55-2.94 | 0.57    |
| Smoking status   | 0.53         | 0.15-1.49 | 0.37    | 0.89      | 0.34-2.02 | 0.78    |

81 Abbreviations: FEV<sub>1</sub>, forced expiratory volume in 1 s, %LAV, percent low attenuation

82 volume

**FIGURE CAPTIONS****Supplementary Figure E1. Selection of patients with COPD in the Hokkaido COPD cohort**

121 patients were recruited at Hokkaido University Hospital. Of 121 patients, 70 patients had CT data at Visit 1 suitable for VIDA analysis and other 26 patients had suitable CT data on Visit 3. Finally, a total of 96 patients were included for the further analysis.

**Supplementary Figure E2. Selection of patients with COPD in the Kyoto University cohort**

One hundred fifty-four male patients with COPD were screened at Kyoto University Hospital. Among them, 24 patients were excluded because of interstitial pneumonia (n=4), bronchial asthma (n=2), bronchiectasis (n=11), abnormal shadows on chest CT scans (n=11), a history of malignancy within the past 5 years (n=5), and a history of lobectomy (n=1). A total 130 male patients were included in the Kyoto University cohort study.

**Supplementary Figure E3. Correlation between fractal  $D$  and %LAV in the Hokkaido COPD cohort (N=96)**

There was a significant negative correlation between fractal  $D$  and percent lung attenuation volume.

**Supplementary Figure E4. Time to first eExacerbation-~~frequency~~ in prescription definition categorized by baseline fractal  $D$  or %LAV in the Hokkaido COPD**

107 **cohort**

108 Patients were divided into those with mild and severe emphysematous changes based on  
109 either median of *D* or median of %LAV. Patients with *D* <median value of 1.47 were  
110 categorized into *D* low category (n=48) and patients with %LAV <median value of 18.95  
111 were categorized into %LAV low category (n=48). [Time to first exacerbation requiring](#)  
112 [the change in their prescriptions was shorter](#) ~~More subjects~~ in the low *D* group  
113 ~~experienced exacerbations requiring the change in their prescriptions~~ than ~~those~~ in the  
114 high *D* group (p=0.01), while the [time to first exacerbation](#) ~~frequency of those~~  
115 ~~exacerbations~~ did not differ between the high and low %LAV groups (p=0.75).

116

117 **[Supplementary](#) Figure E5. Histogram of %FEV<sub>1</sub> in the Hokkaido COPD cohort**  
118 **and the Kyoto University cohort**

119 The median percent forced expiratory in 1 second (%FEV<sub>1</sub>) in the Hokkaido COPD  
120 cohort is equivalent to the 68<sup>th</sup> percentile of %FEV<sub>1</sub> in the Kyoto University cohort.

121

122 **[Supplementary](#) Figure E6. Comparisons of [time to first](#) exacerbation ~~frequency~~**  
123 **and mortality between mild and severe emphysematous change on CT using the**  
124 **68<sup>th</sup> percentile-based categorization. in the Kyoto University cohort**

125 The 68<sup>th</sup> percentile of *D* and the 32<sup>th</sup> percentile of percent low attenuation volume  
126 (%LAV) were used to divide patients into mild and severe emphysema groups, [Time to](#)  
127 [first exacerbation was](#) ~~Exacerbations were more common~~ [shorter](#) in subjects with the  
128 low *D* group than in those with the high *D* group but did not differ ~~in frequency~~ between  
129 those with the low %LAV and those with high %LAV groups. The mortality rate was  
130 higher in subjects with the high %LAV group than in those with the low %LAV group



131 but did not differ between those with the low D and those with high D groups.

132
