# Supplementary material
Source: HighWire-hosted journal article supplement (https://thorax.bmj.com/content/75/2/116)

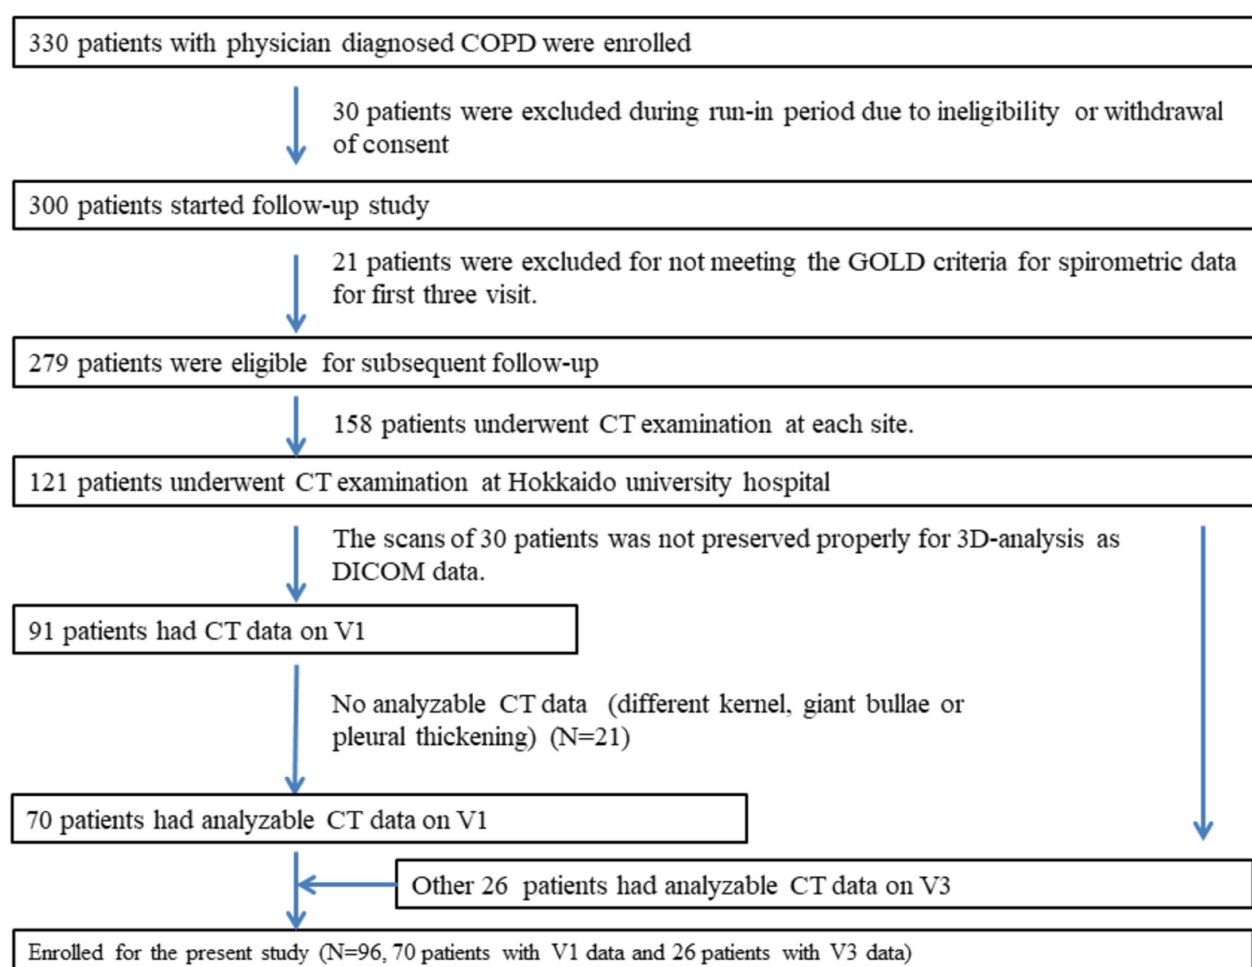

Supplement: inline-supplementary-material-1 [file inline-supplementary-material-1.pdf]

Figure E2.

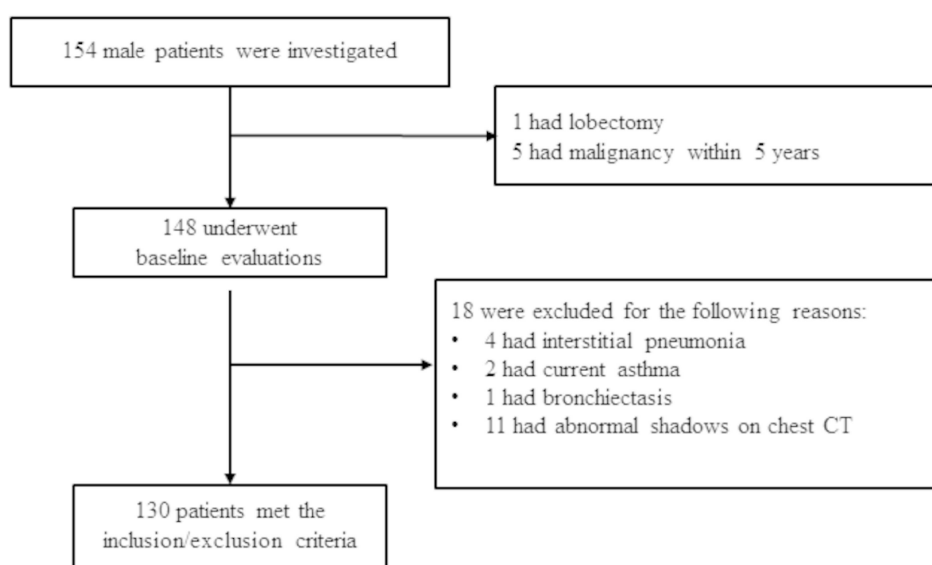

Supplement: inline-supplementary-material-2 [file inline-supplementary-material-2.pdf]
